# Supplementary material for: Weak antiferromagnetic coupling for novel linear hexanuclear nickel(ii) string complexes (Ni612+) and partial metal–metal bonds in their one-electron reduction products (Ni611+)
Source: Royal Society of Chemistry journal article supplement (doi:10.1039/b516749c), 2006-01-01
Supplement: b516749c.pdf [file b516749c.pdf]

Supplementary Information for  
**Weak antiferromagnetic coupling for novel linear hexanuclear  
nickel(II) string complexes ( $\text{Ni}_6^{12+}$ ) and partial metal-metal bonds in  
their one-electron reduction products ( $\text{Ni}_6^{11+}$ )**

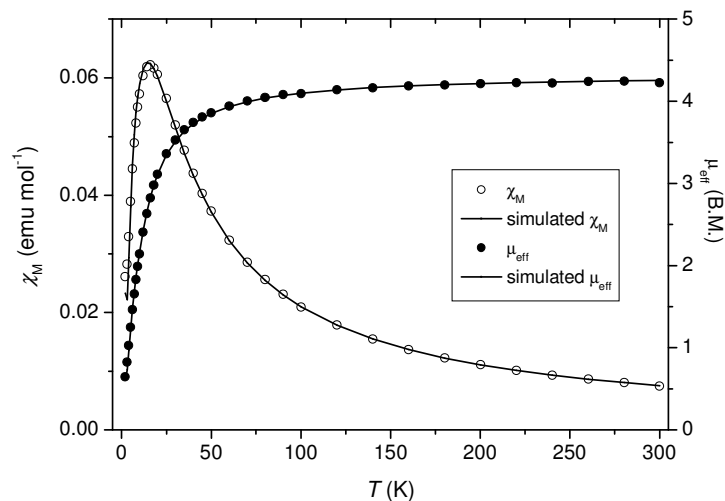

**Fig. S1** The magnetic behavior for compound **3**: molar magnetic susceptibility  $\chi_M$  ( $\circ$ ), temperature-dependent effective magnetic moments  $\mu_{\text{eff}}$  ( $\bullet$ ), and simulations (solid line, —).

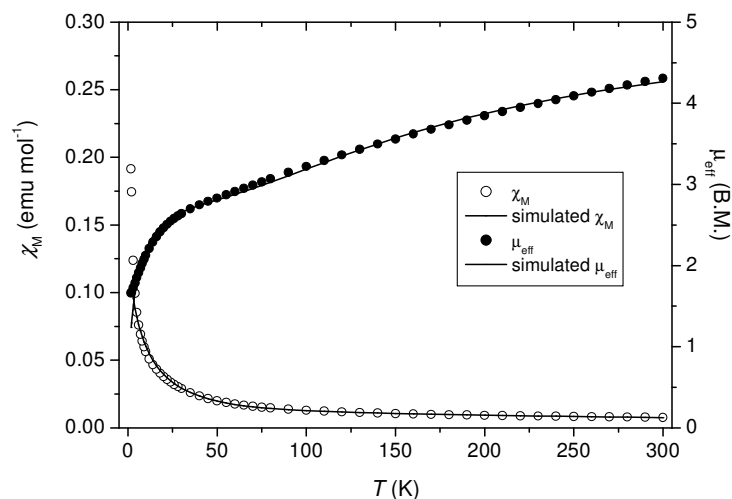

**Fig. S2** The magnetic behavior for compound **4**: molar magnetic susceptibility  $\chi_M$  ( $\circ$ ), temperature-dependent effective magnetic moments  $\mu_{\text{eff}}$  ( $\bullet$ ), and simulations (solid line, —).

**Scheme S1** The linear trinuclear (A—B—A) model.

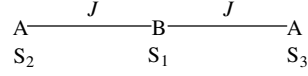

$$\mathbf{H} = -2J(\mathbf{S}_1\mathbf{S}_2 + \mathbf{S}_1\mathbf{S}_3) - 2J'\mathbf{S}_2\mathbf{S}_3$$

$$E(\mathbf{S}_T, \mathbf{S}_{23}) = -J[\mathbf{S}_T(\mathbf{S}_T + 1) - \sum_{i=1}^3 \mathbf{S}_i(\mathbf{S}_i + 1)] - (J' - J)[\mathbf{S}_{23}(\mathbf{S}_{23} + 1) - \mathbf{S}_2(\mathbf{S}_2 + 1) - \mathbf{S}_3(\mathbf{S}_3 + 1)]$$

$$J' = 0$$

$$E(\mathbf{S}_T, \mathbf{S}_{23}) = -J\mathbf{S}_T(\mathbf{S}_T + 1) + J\mathbf{S}_{23}(\mathbf{S}_{23} + 1) + J\sum_{i=1}^3 \mathbf{S}_i(\mathbf{S}_i + 1) - J[\mathbf{S}_2(\mathbf{S}_2 + 1) + \mathbf{S}_3(\mathbf{S}_3 + 1)]$$

$$\mathbf{S}_{23} = \mathbf{S}_2 + \mathbf{S}_3, \mathbf{S}_T = \mathbf{S}_{23} + \mathbf{S}_1$$

$$\mathbf{S}_1 = 1/2, \mathbf{S}_2 = \mathbf{S}_3 = 1$$

$$\text{So } \mathbf{S}_{23} = 0 \rightarrow \mathbf{S}_T = 1/2$$

$$\mathbf{S}_{23} = 1 \rightarrow \mathbf{S}_T = 1/2, 3/2$$

$$\mathbf{S}_{23} = 2 \rightarrow \mathbf{S}_T = 1/2, 3/2, 5/2$$

$$E(1/2, 0) = -3J/4 \rightarrow -6J$$

$$E(1/2, 1) = -3J/4 + 2J \rightarrow -4J$$

$$E(3/2, 1) = -15J/4 + 2J \rightarrow -7J$$

$$E(1/2, 2) = -3J/4 + 6J \rightarrow 0$$

$$E(3/2, 2) = -15J/4 + 6J \rightarrow -3J$$

$$E(5/2, 2) = -35J/4 + 6J \rightarrow -8J$$

$$\chi = \frac{Ng^2\beta^2}{4kT} \times \frac{1 + 10e^{3J/kT} + e^{4J/kT} + e^{6J/kT} + 10e^{7J/kT} + 35e^{8J/kT}}{1 + 2e^{3J/kT} + e^{4J/kT} + e^{6J/kT} + 2e^{7J/kT} + 3e^{8J/kT}}$$

When the impurities are taken into account, the equation of  $\chi_M$  is corrected by Weiss constant as following:

$$\begin{aligned} \chi &= \frac{Ng^2\beta^2}{4k(T-\theta)} \times \frac{1 + 10e^{3J/kT} + e^{4J/kT} + e^{6J/kT} + 10e^{7J/kT} + 35e^{8J/kT}}{1 + 2e^{3J/kT} + e^{4J/kT} + e^{6J/kT} + 2e^{7J/kT} + 3e^{8J/kT}} \times (1-\rho) + \frac{Ng^2\beta^2 \sum \mathbf{S}_i(\mathbf{S}_i + 1)}{3k(T-\theta)} \times \rho \\ &= \frac{Ng^2\beta^2}{4k(T-\theta)} \times \frac{1 + 10e^{3J/kT} + e^{4J/kT} + e^{6J/kT} + 10e^{7J/kT} + 35e^{8J/kT}}{1 + 2e^{3J/kT} + e^{4J/kT} + e^{6J/kT} + 2e^{7J/kT} + 3e^{8J/kT}} \times (1-\rho) + \frac{4Ng^2\beta^2}{k(T-\theta)} \times \rho \end{aligned}$$

$$\text{where } \sum \mathbf{S}_i(\mathbf{S}_i + 1) = 6 \times 1 \times (1+1) = 12$$

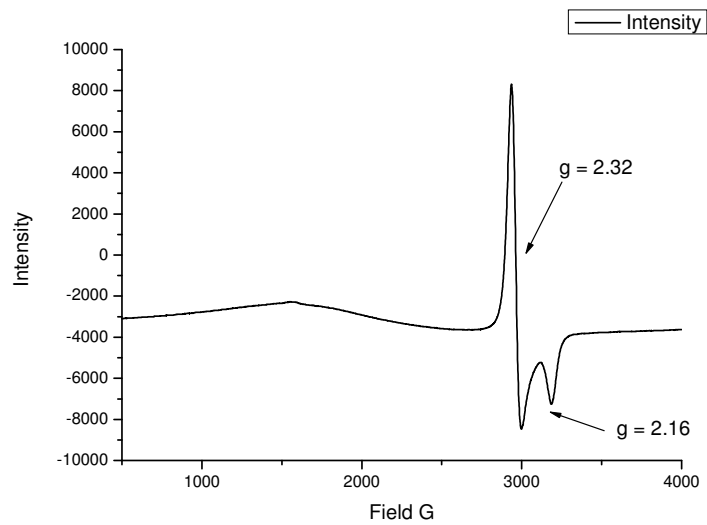

**Fig. S3** The EPR spectrum of compound **2** in  $\text{CH}_2\text{Cl}_2$  at 77 K.

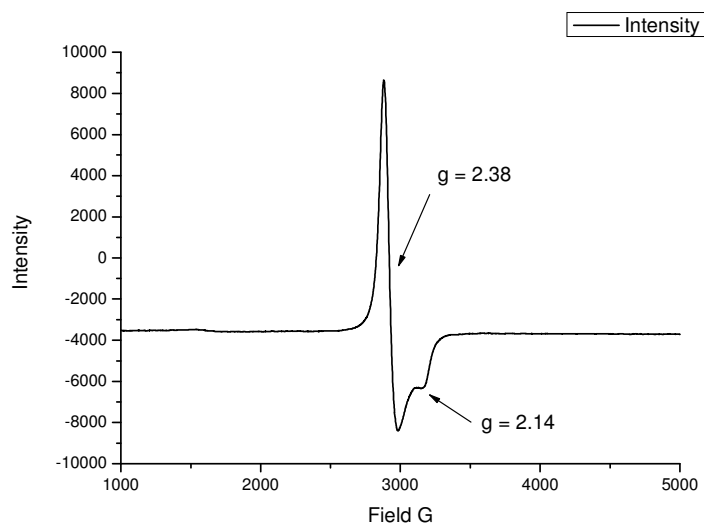

**Fig. S4** The EPR spectrum of compound **4** in  $\text{CH}_2\text{Cl}_2$  at 77 K.
